# Supplementary material for: MeCP2 binds to methylated DNA independently of phase separation and heterochromatin organisation
Source: PubMed Central journal article supplement (PMC11079052; doi:10.1038/s41467-024-47395-1), 2024-05-08
Supplement: 41467_2024_47395_MOESM3_ESM.pdf [file 41467_2024_47395_MOESM3_ESM.pdf]

## **Description of Additional Supplementary Files**

File Name: Supplementary Data 1

Description: List of cell lines used in the study
